# Supplementary material
Source: ML conference proceedings conference paper supplement (https://openaccess.thecvf.com/content/WACV2025/html/Gu_ORID_Organ-Regional_Information_WACV_2025_paper.html)
Supplement: Supplementary file 1 [file Gu_ORID_Organ-Regional_Information_WACV_2025_supplemental.pdf]

# ORID: Organ-Regional Information Driven Framework for Radiology Report Generation (Supplementary Material)

Tiancheng Gu<sup>♥\*</sup>, Kaicheng Yang<sup>♣\*</sup>  
 Xiang An<sup>♣</sup>, Ziyong Feng<sup>♣</sup>, Dongnan Liu<sup>♥</sup>, Weidong Cai<sup>♥†</sup>  
<sup>♥</sup>University of Sydney <sup>♣</sup>DeepGlint  
 tigu8498@uni.sydney.edu.au, kaichengyang@deepglint.com

## A. Appendix

### A.1. Disease Symptom Graph

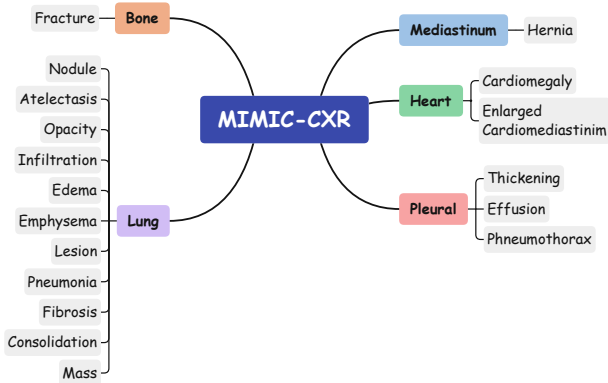

Figure 1. The symptom graph summarizes the related diseases for each organ in the MIMIC-CXR dataset.

Fig. 1 illustrates the detailed knowledge graph of disease symptoms derived from prior disease captions. This graph, referenced from [2], was constructed based on a professional analysis of the relationships between organs and their corresponding diseases as observed in radiology images. Utilizing this graph, we developed the instruction-tuning dataset and the adjacency matrix for the Graph Neural Network (GNN).

### A.2. Benchmark Information

Table 1 presents comprehensive information on the two benchmark datasets employed to evaluate our ORID framework. The data indicate that the MIMIC-CXR dataset encompasses a greater number of cases compared to the IU-XRAY dataset.

| DATASET   | IU-XRAY [1] |      |      | MIMIC-CXR [3] |      |      |
|-----------|-------------|------|------|---------------|------|------|
|           | Train       | Val. | Test | Train         | Val. | Test |
| IMAGE     | 5.2K        | 0.7K | 1.5K | 369.0K        | 3.0K | 5.2K |
| REPORT    | 2.8K        | 0.4K | 0.8K | 222.8K        | 1.8K | 3.3K |
| PATIENT   | 2.8K        | 0.4K | 0.8K | 64.6K         | 0.5K | 0.3K |
| AVG. LEN. | 37.6        | 36.8 | 33.6 | 53.0          | 53.1 | 66.4 |

Table 1. The specifications of two benchmark datasets that will be utilized to test the ORID model.

| ORGAN MASK    | NUM. | REGION      | TOTAL MASK |
|---------------|------|-------------|------------|
| Lung lobes    | 5    | Lung        | 159        |
| Lung zones    | 8    |             |            |
| Lung halves   | 2    |             |            |
| Heart region  | 6    | Heart       |            |
| Mediastinum   | 6    | Mediastinum |            |
| Diaphragm     | 3    |             |            |
| Ribs          | 46   | Bone        |            |
| Ribs super    | 24   |             |            |
| Trachea       | 2    | Pleural     |            |
| Vessels       | 6    |             |            |
| Breast Tissue | 2    |             |            |
| ...           | ...  | ...         | ...        |

Table 2. The specific information of masks generated by the CXAS model [4], as well as the mask images we ultimately used.

### A.3. Mask Information

Table 2 provides specific details regarding the small organ masks included for each organ set. Furthermore, the visualization of these mask sets alongside the original images is presented in Fig. 2.

\*Equal contribution.  
 †Corresponding author.

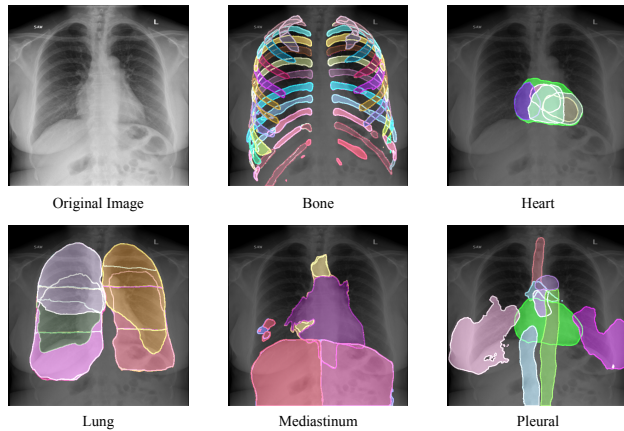

Figure 2. The visualization of the organ mask sets with the original image. Due to each organ region corresponding to several small organ parts, the different color means different part organ mask images in its corresponding regions.

#### A.4. Instruction-tuning Dataset

Fig. 3 presents examples from the instruction-tuning dataset. Notably, each image is accompanied by more than four question-answer pairs pertaining to various organs.

#### A.5. Case Study

We have shown the results of our ORID framework generated compared with that of ground truth in Fig. 4. We have also marked the **pleural**, **heart**, **lung**, **bone**, and **mediastinum** in different colors. More specifically, Example 1 shows the disease symptoms related to the heart and lungs; Example 2 shows the disease symptoms related to the heart.

## References

- [1] D. Demner-Fushman, M. D. Kohli, M. B. Rosenman, S. E. Shooshan, L. Rodriguez, S. Antani, and C. J. McDonald. Preparing a collection of radiology examinations for distribution and retrieval. *Journal of the American Medical Informatics Association*, 2016. 1
- [2] Z. Huang, X. Zhang, and S. Zhang. Kiut: Knowledge-injected u-transformer for radiology report generation. In *CVPR*, 2023. 1
- [3] A. E. Johnson, T. J. Pollard, S. J. Berkowitz, N. R. Greenbaum, M. P. Lungren, C. Y. Deng, and S. Horng. MIMIC-CXR, a de-identified publicly available database of chest radiographs with free-text reports. *Scientific Data*, 2019. 1
- [4] C. Seibold, A. Jaus, M. A. Fink, M. Kim, S. Reiß, K. Herrmann, and R. Stiefelhagen. Accurate fine-grained segmentation of human anatomy in radiographs via volumetric pseudo-labeling. *arXiv preprint arXiv:2306.03934*, 2023. 1

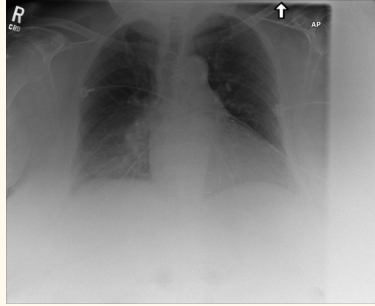

Q: What have you found in **heart**?  
 A: Heart size is moderately enlarged.  
 Q: What have you found in **bone**?  
 A: There is a fracture of superior sternotomy xxxx unchanged.  
 Q: What have you found in **pleural**?  
 A: There is no pleural effusion or pneumothorax.  
 Q: What have you found in **mediastinum**?  
 A: The pulmonary xxxx and mediastinum are within normal limits.  
 Q: What have you found in **lung**?  
 A: There is suspected right lower lobe airspace opacity xxxx demonstrated on the lateral study.

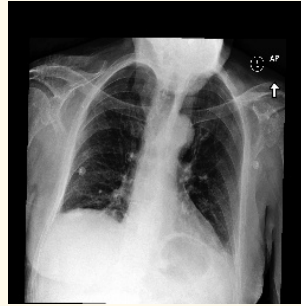

Q: What have you found in **heart**?  
 A: The heart is normal in size given the low lung volumes.  
 Q: What have you found in **bone**?  
 A: The bones are diffusely demineralized which limits assessment.  
 Q: What have you found in **pleural**?  
 A: There are possible small left pleural effusion.  
 Q: What have you found in **lung**?  
 A: Decreased lung volumes are noted causing crowding of the central bronchovascular structures.

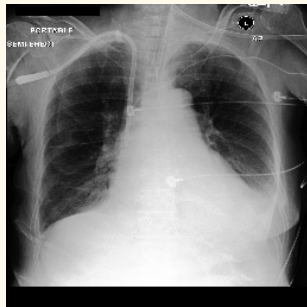

Q: What have you found in **heart**?  
 A: The heart is mildly enlarged, unchanged.  
 Q: What have you found in **pleural**?  
 A: Small left pleural effusion has slightly decreased.  
 Q: What have you found in **mediastinum**?  
 A: The mediastinum is not widened.  
 Q: What have you found in **lung**?  
 A: The right lung is clear. Moderate left lower lobe atelectasis is overall unchanged. No frank pulmonary edema.

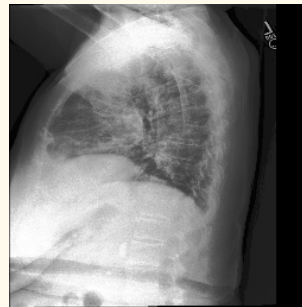

Q: What have you found in **heart**?  
 A: Allowing for this, the cardiomeastinal silhouette is unchanged, with a heart size at the upper limits of normal.  
 Q: What have you found in **bone**?  
 A: No lucent or sclerotic rib fracture line or displaced rib fracture is detected.  
 Q: What have you found in **pleural**?  
 A: No focal consolidation or effusion is identified.  
 Q: What have you found in **lung**?  
 A: There is minimal bibasilar atelectasis, right-greater-than-left, which is slightly more pronounced than on \_\_\_\_.

Figure 3. The examples about the RRG instruction dataset to instruction tuning the LLaVA-Med

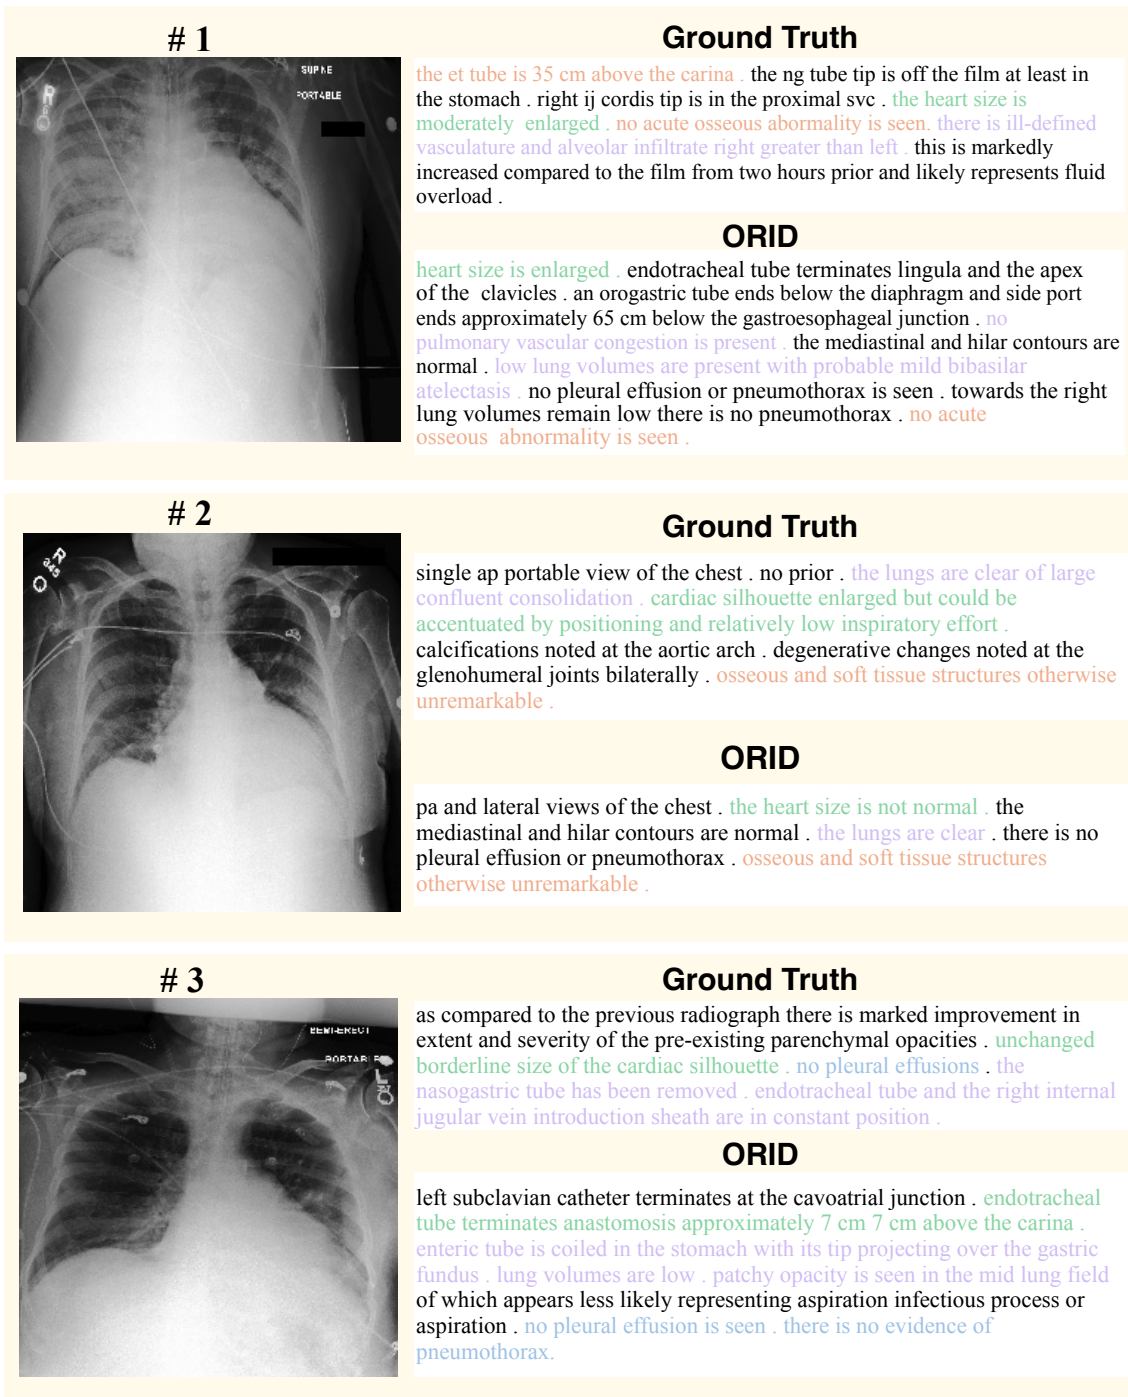

Figure 4. The visualization of prediction results by the ORID model. We specifically highlight the pleural, heart, lung, bone, and mediastinum with different colours in the radiology report.
